# Supplementary material
Source: PubMed Central journal article supplement (PMC5867248)

**IM****OM****HtrA****OspB****DnaK****Lon-1****Lp6.6****FlaB****P66****GM1**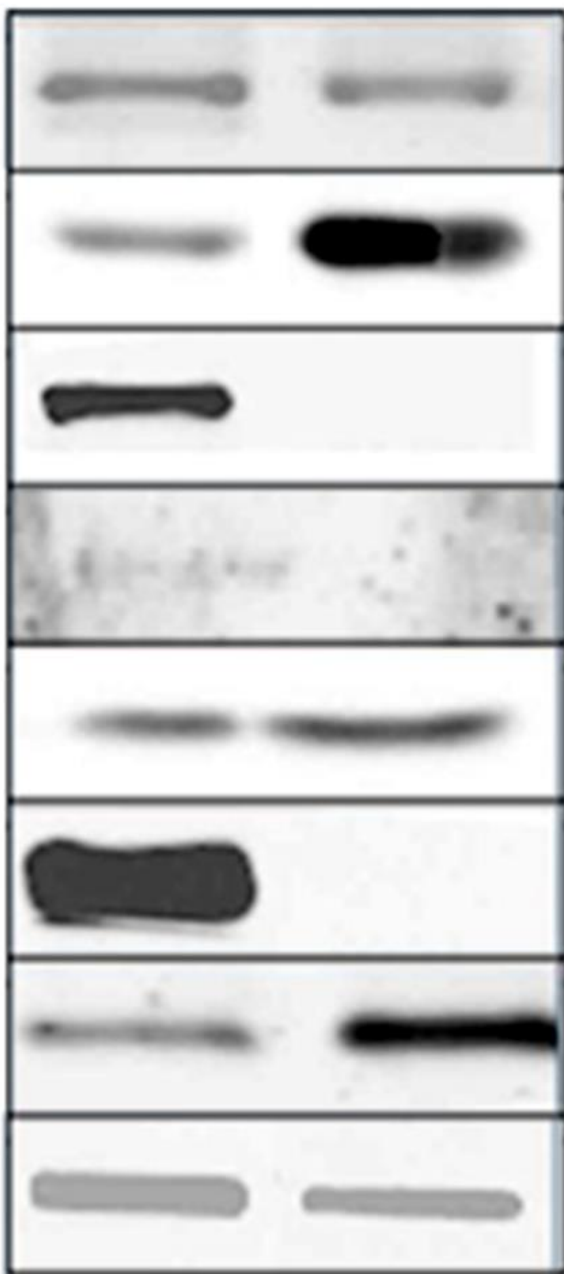

**A**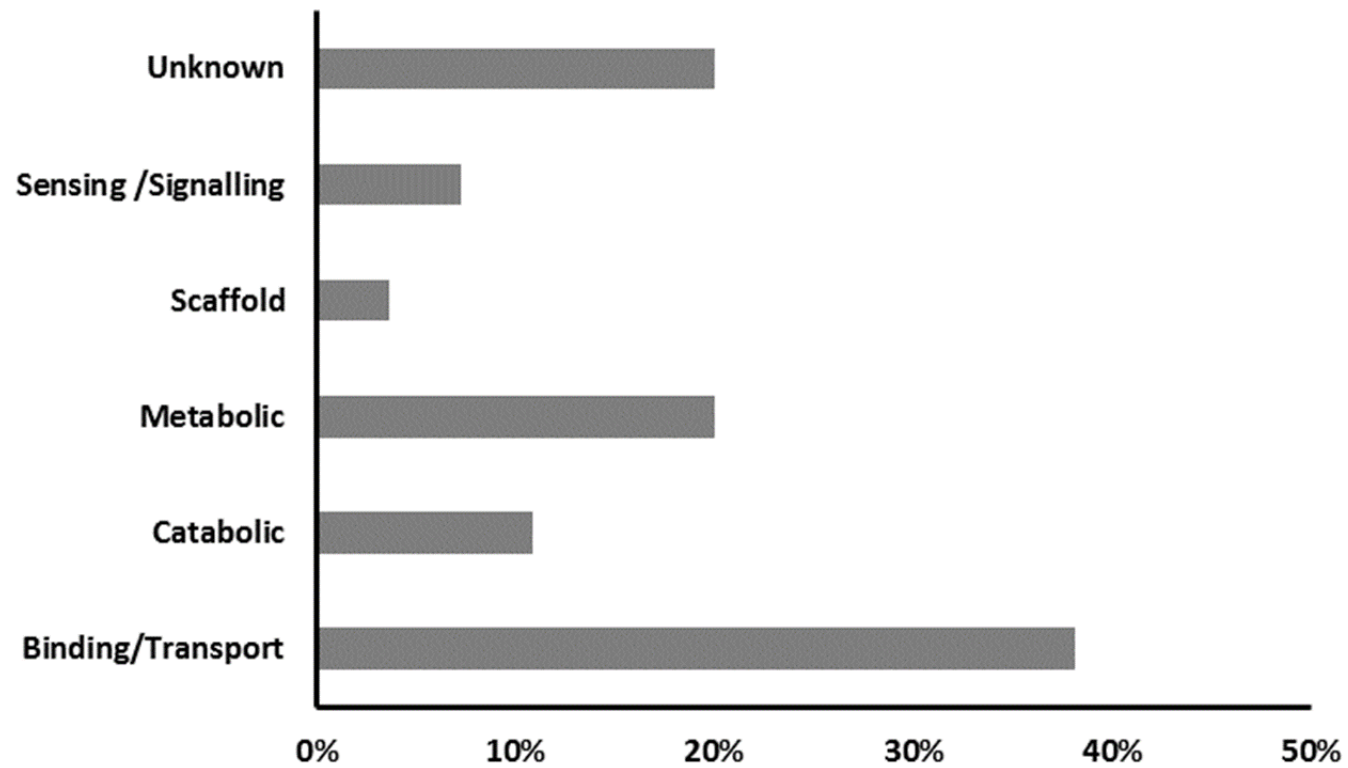**B**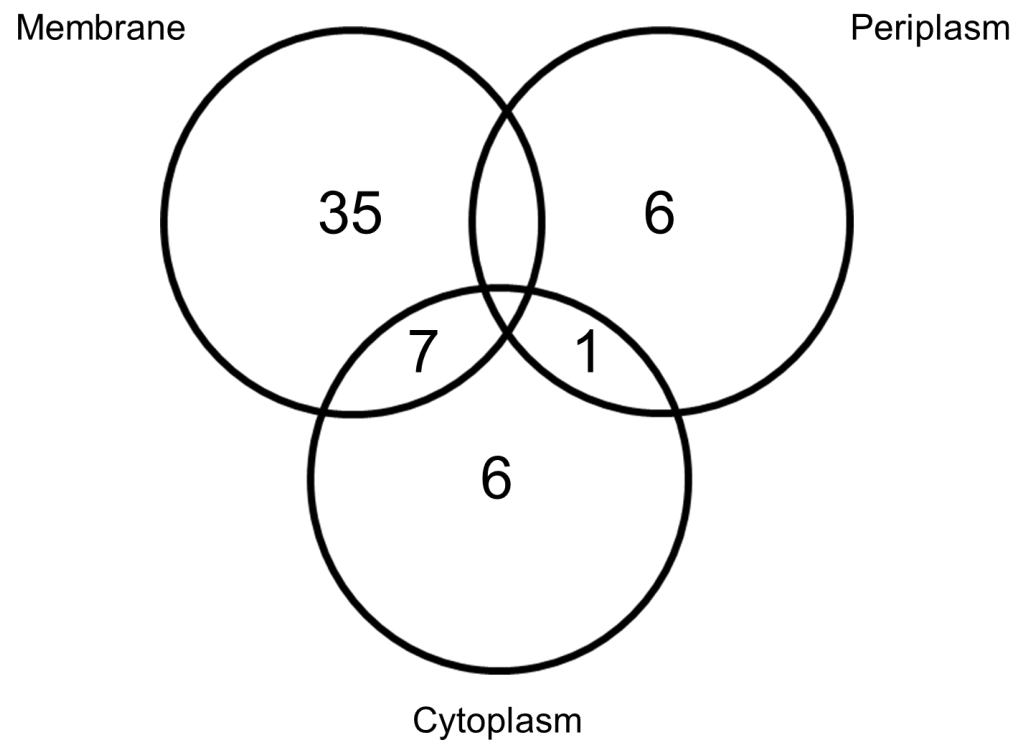

Supplement: NIHMS936491-supplement-Supp_info.pdf [file NIHMS936491-supplement-Supp_info.pdf]
